# Supplementary material for: Cine con la mar de fondo: El diablo de las aguas turbias
Source: Springer Nature journal article supplement (doi:10.1038/s41467-020-20655-6), 2008-01-01
Supplement: 41467_2020_20655_MOESM1_ESM.pdf [file 41467_2020_20655_MOESM1_ESM.pdf]

**File Name:** Supplementary Video 1

**Description:** Visualization of Task-Specific Distributions of Discriminative Biomarkers. The rationality of the DL model decisions was verified by examining the peak activations in the task-specific aggregate saliency maps. This animation loops over the different axial slices of the aggregate saliency maps for each of the undertaken classification/regression tasks.
